# Supplementary material for: Ti2C80 is more likely a titanium carbide endohedral metallofullerene (Ti2C2)@C78
Source: Royal Society of Chemistry journal article supplement (doi:10.1039/b507855e), 2005-01-01
Supplement: b507855e.pdf [file b507855e.pdf]

**Ti<sub>2</sub>C<sub>80</sub> is more likely a Titanium Carbide Endohedral Metallofullerene  
(Ti<sub>2</sub>C<sub>2</sub>)@C<sub>78</sub>**

Kai Tan, Xin Lu\*

*State Key Laboratory of Physical Chemistry of Solid Surface & Center for Theoretical Chemistry, Department of Chemistry, Xiamen University, Xiamen 361005, CHINA.*

E-mail: xinlu@xmu.edu.cn

## Contents

S1 Cartesian coordinates and energies of the optimized Ti<sub>2</sub>@C<sub>80</sub> and Ti<sub>2</sub>C<sub>2</sub>@C<sub>78</sub>

**Fig. S1** Selected molecular orbitals of Ti<sub>2</sub>@C<sub>80</sub> (D<sub>2h</sub>) that have significant contributions from the valence orbitals of Ti atoms.

**Fig. S2** Selected molecular orbitals of Ti<sub>2</sub>C<sub>2</sub>@C<sub>78</sub> (C<sub>2v</sub>).

S1 Cartesian coordinates and energies of the optimized  $\text{Ti}_2@C_{80}$  and  $\text{Ti}_2C_2@C_{78}$

A.  $\text{Ti}_2@C_{80}$  ( $D_{2h}$ ) RB3LYP/DZP optimization.

$E_{\text{tot}}(\text{Singlet}) = -3164.46183$  hartree;  $E_{\text{tot}}(\text{triplet}) = -3164.48419$  au.

Coordinates:

C,0,3.0698377446,2.6713275979,0.  
C,0,2.3590857601,3.1511349249,1.1678786049  
C,0,3.8834237562,1.4955750296,0.  
C,0,3.9160044099,0.7326342589,1.2353217325  
C,0,3.0947361932,1.1569073767,2.3506122781  
C,0,2.3259526995,2.3677671762,2.3591145615  
C,0,2.3590857601,3.1511349249,-1.1678786049  
C,0,1.2200184705,3.8765743217,0.7255087512  
C,0,3.9160044099,0.7326342589,-1.2353217325  
C,0,3.9160044099,-0.7326342589,1.2353217325  
C,0,2.6379846753,0.,3.0605242098  
C,0,1.2200184705,3.8765743217,-0.7255087512  
C,0,1.1593558605,2.3991297223,3.1609198864  
C,0,3.0947361932,-1.1569073767,2.3506122781  
C,0,2.3259526995,2.3677671762,-2.3591145615  
C,0,3.0947361932,1.1569073767,-2.3506122781  
C,0,3.9160044099,-0.7326342589,-1.2353217325  
C,0,0.,3.829063024,1.4702576756  
C,0,3.8834237562,-1.4955750296,0.  
C,0,0.,3.1188268607,2.7100067497  
C,0,0.7134174862,1.2308733461,3.8882020784  
C,0,1.4314271612,0.,3.8227945986  
C,0,0.,3.829063024,-1.4702576756  
C,0,2.6379846753,0.,-3.0605242098  
C,0,3.0947361932,-1.1569073767,-2.3506122781  
C,0,1.1593558605,2.3991297223,-3.1609198864  
C,0,2.3259526995,-2.3677671762,2.3591145615  
C,0,-1.1593558605,2.3991297223,3.1609198864  
C,0,-1.2200184705,3.8765743217,0.7255087512  
C,0,-0.7134174862,1.2308733461,3.8882020784  
C,0,3.0698377446,-2.6713275979,0.  
C,0,0.,3.1188268607,-2.7100067497  
C,0,0.7134174862,-1.2308733461,3.8882020784  
C,0,-1.2200184705,3.8765743217,-0.7255087512  
C,0,2.3590857601,-3.1511349249,1.1678786049  
C,0,1.1593558605,-2.3991297223,3.1609198864  
C,0,0.7134174862,1.2308733461,-3.8882020784  
C,0,1.4314271612,0.,-3.8227945986  
C,0,2.3259526995,-2.3677671762,-2.3591145615

C,0,2.3590857601,-3.1511349249,-1.1678786049  
C,0,-2.3590857601,3.1511349249,1.1678786049  
C,0,-2.3259526995,2.3677671762,2.3591145615  
C,0,-1.4314271612,0.,3.8227945986  
C,0,-0.7134174862,-1.2308733461,3.8882020784  
C,0,-1.1593558605,2.3991297223,-3.1609198864  
C,0,-2.3590857601,3.1511349249,-1.1678786049  
C,0,1.2200184705,-3.8765743217,0.7255087512  
C,0,-0.7134174862,1.2308733461,-3.8882020784  
C,0,0.,-3.1188268607,2.7100067497  
C,0,-3.0698377446,2.6713275979,0.  
C,0,0.7134174862,-1.2308733461,-3.8882020784  
C,0,1.2200184705,-3.8765743217,-0.7255087512  
C,0,1.1593558605,-2.3991297223,-3.1609198864  
C,0,-2.3259526995,2.3677671762,-2.3591145615  
C,0,-1.1593558605,-2.3991297223,3.1609198864  
C,0,-3.0947361932,1.1569073767,2.3506122781  
C,0,-2.6379846753,0.,3.0605242098  
C,0,0.,-3.829063024,1.4702576756  
C,0,-1.4314271612,0.,-3.8227945986  
C,0,-0.7134174862,-1.2308733461,-3.8882020784  
C,0,0.,-3.1188268607,-2.7100067497  
C,0,-3.8834237562,1.4955750296,0.  
C,0,0.,-3.829063024,-1.4702576756  
C,0,-3.9160044099,0.7326342589,1.2353217325  
C,0,-3.0947361932,-1.1569073767,2.3506122781  
C,0,-2.3259526995,-2.3677671762,2.3591145615  
C,0,-3.0947361932,1.1569073767,-2.3506122781  
C,0,-1.1593558605,-2.3991297223,-3.1609198864  
C,0,-1.2200184705,-3.8765743217,0.7255087512  
C,0,-2.6379846753,0.,-3.0605242098  
C,0,-3.9160044099,0.7326342589,-1.2353217325  
C,0,-3.9160044099,-0.7326342589,1.2353217325  
C,0,-1.2200184705,-3.8765743217,-0.7255087512  
C,0,-2.3590857601,-3.1511349249,1.1678786049  
C,0,-2.3259526995,-2.3677671762,-2.3591145615  
C,0,-3.0947361932,-1.1569073767,-2.3506122781  
C,0,-3.9160044099,-0.7326342589,-1.2353217325  
C,0,-3.8834237562,-1.4955750296,0.  
C,0,-2.3590857601,-3.1511349249,-1.1678786049  
C,0,-3.0698377446,-2.6713275979,0.  
Ti,0,-2.2506033191,0.,0.  
Ti,0,2.2506033191,0.,0.

B.  $\text{Ti}_2\text{C}_2@C_{78}$  ( $C_{2v}$ ) RB3LYP/DZP optimization.

$E_{\text{tot}}(\text{Singlet}) = -3164.43756$  hartree.

Coordinates:

C,0,0.7141573092,3.951135117,1.2614543732  
C,0,-0.7141573092,3.951135117,1.2614543732  
C,0,1.4432370453,3.9685553632,0.0016799916  
C,0,-1.4432370453,3.9685553632,0.0016799916  
C,0,0.7307999023,4.0013437501,-1.2421736464  
C,0,-0.7307999023,4.0013437501,-1.2421736464  
C,0,1.4133461956,3.1020660274,2.1750800546  
C,0,2.5810882684,3.1012544452,0.1484827309  
C,0,-1.4133461956,3.1020660274,2.1750800546  
C,0,-2.5810882684,3.1012544452,0.1484827309  
C,0,1.1658218686,3.0928327488,-2.2727380872  
C,0,-1.1658218686,3.0928327488,-2.2727380872  
C,0,2.6067254523,2.6428429766,1.5112964771  
C,0,-2.6067254523,2.6428429766,1.5112964771  
C,0,0.,2.6230188632,-2.9692312778  
C,0,0.7350399019,2.3081676369,3.1712528963  
C,0,-0.7350399019,2.3081676369,3.1712528963  
C,0,3.1189728056,2.3119586432,-0.9357359695  
C,0,2.3825823022,2.3099762503,-2.2062872347  
C,0,-3.1189728056,2.3119586432,-0.9357359695  
C,0,-2.3825823022,2.3099762503,-2.2062872347  
C,0,3.2302057081,1.4192322835,1.8718263291  
C,0,-3.2302057081,1.4192322835,1.8718263291  
C,0,0.,1.411891926,-3.7105678388  
C,0,1.4224341183,1.1623671669,3.6142075108  
C,0,-1.4224341183,1.1623671669,3.6142075108  
C,0,3.8416844622,1.1648529144,-0.5595372267  
C,0,2.4127518229,1.1648197324,-3.0225102256  
C,0,-3.8416844622,1.1648529144,-0.5595372267  
C,0,-2.4127518229,1.1648197324,-3.0225102256  
C,0,2.6516546582,0.7081656091,2.9621186213  
C,0,3.8894656692,0.7088211571,0.8276922531  
C,0,-2.6516546582,0.7081656091,2.9621186213  
C,0,-3.8894656692,0.7088211571,0.8276922531  
C,0,1.235240888,0.7087749277,-3.7620019015  
C,0,-1.235240888,0.7087749277,-3.7620019015  
C,0,0.701478258,0.,4.0387428353  
C,0,-0.701478258,0.,4.0387428353  
C,0,3.838834706,0.,-1.3967007329  
C,0,3.1404640137,0.,-2.6091028144  
C,0,-3.838834706,0.,-1.3967007329

C,0,-3.1404640137,0,-2.6091028144  
C,0,2.6516546582,-0.7081656091,2.9621186213  
C,0,3.8894656692,-0.7088211571,0.8276922531  
C,0,-2.6516546582,-0.7081656091,2.9621186213  
C,0,-3.8894656692,-0.7088211571,0.8276922531  
C,0,1.235240888,-0.7087749277,-3.7620019015  
C,0,-1.235240888,-0.7087749277,-3.7620019015  
C,0,1.4224341183,-1.1623671669,3.6142075108  
C,0,-1.4224341183,-1.1623671669,3.6142075108  
C,0,3.8416844622,-1.1648529144,-0.5595372267  
C,0,2.4127518229,-1.1648197324,-3.0225102256  
C,0,-3.8416844622,-1.1648529144,-0.5595372267  
C,0,-2.4127518229,-1.1648197324,-3.0225102256  
C,0,3.2302057081,-1.4192322835,1.8718263291  
C,0,-3.2302057081,-1.4192322835,1.8718263291  
C,0,0,-1.411891926,-3.7105678388  
C,0,0.7350399019,-2.3081676369,3.1712528963  
C,0,-0.7350399019,-2.3081676369,3.1712528963  
C,0,3.1189728056,-2.3119586432,-0.9357359695  
C,0,2.3825823022,-2.3099762503,-2.2062872347  
C,0,-3.1189728056,-2.3119586432,-0.9357359695  
C,0,-2.3825823022,-2.3099762503,-2.2062872347  
C,0,2.6067254523,-2.6428429766,1.5112964771  
C,0,-2.6067254523,-2.6428429766,1.5112964771  
C,0,0,-2.6230188632,-2.9692312778  
C,0,1.4133461956,-3.1020660274,2.1750800546  
C,0,2.5810882684,-3.1012544452,0.1484827309  
C,0,-1.4133461956,-3.1020660274,2.1750800546  
C,0,-2.5810882684,-3.1012544452,0.1484827309  
C,0,1.1658218686,-3.0928327488,-2.2727380872  
C,0,-1.1658218686,-3.0928327488,-2.2727380872  
C,0,0.7141573092,-3.951135117,1.2614543732  
C,0,-0.7141573092,-3.951135117,1.2614543732  
C,0,1.4432370453,-3.9685553632,0.0016799916  
C,0,-1.4432370453,-3.9685553632,0.0016799916  
C,0,0.7307999023,-4.0013437501,-1.2421736464  
C,0,-0.7307999023,-4.0013437501,-1.2421736464  
C,0,0,0,-0.5961220299  
C,0,0,0,0.6732975789  
Ti,0,0,-2.2919110744,-0.1308932288  
Ti,0,0,2.2919110744,-0.1308932288

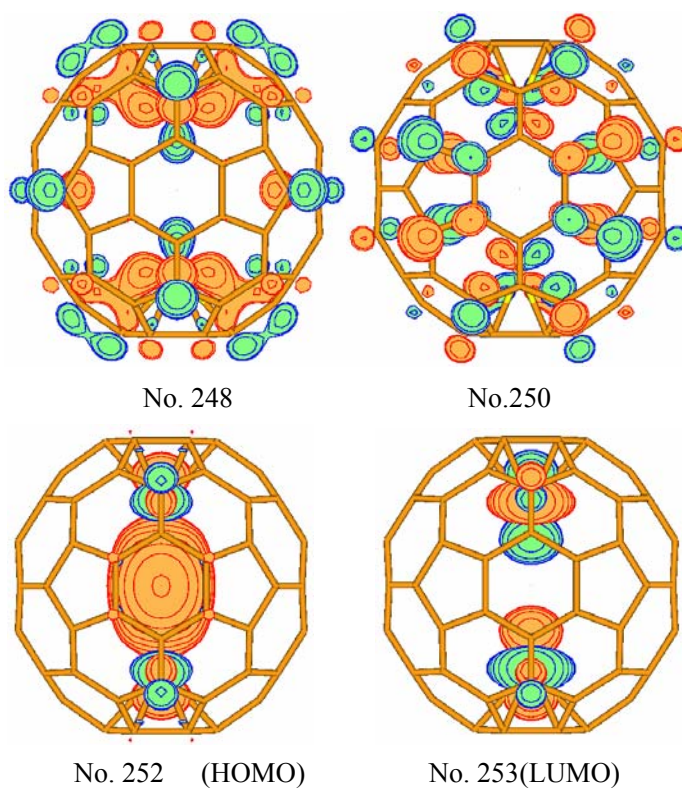

**Fig. S1** Selected molecular orbitals of singlet  $\text{Ti}_2@C_{80}$  ( $D_{2h}$ ) that have significant contributions from the valence orbitals of Ti atoms. Note the No.252 MO is mainly localized on the Ti atoms.

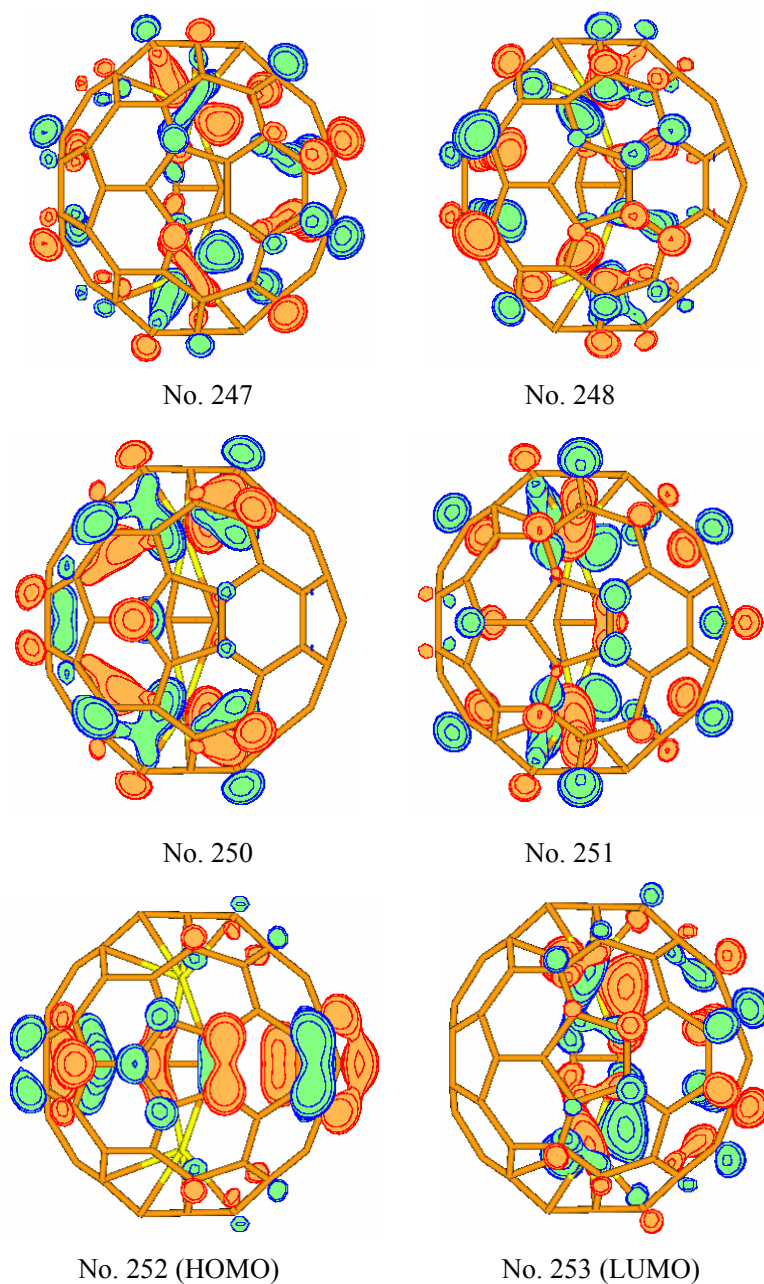

**Fig. S2** Selected molecular orbitals of  $\text{Ti}_2\text{C}_2@C_{78}$  ( $C_{2v}$ ), among which Nos. 247, 248, 250, and 251 MOs have contributions from the valence orbitals of Ti atoms.
